1 **Blood meal analysis of tsetse flies (*Glossina pallidipes*:**  
2 **Glossinidae) reveals higher host fidelity on wild compared**  
3 **with domestic hosts**

4 Manun Channumsin<sup>1\*</sup>, Marc Ciosi<sup>2</sup>, Dan Masiga<sup>3</sup>, Harriet Auty<sup>4</sup>, C. Michael Turner<sup>5</sup>,  
5 Elizabeth Kilbride<sup>4</sup> and Barbara K. Mable<sup>4\*</sup>

6 \*Correspondence: [manun\\_wo@rmutto.ac.th](mailto:manun_wo@rmutto.ac.th), [barbara.mable@glasgow.ac.uk](mailto:barbara.mable@glasgow.ac.uk).

7 <sup>1</sup> Faculty of Veterinary Medicine, Rajamangala University of Technology Tawan-Ok,  
8 Chonburi, 20110, Thailand

9 <sup>2</sup> Institute of Molecular, Cell and Systems Biology (MCSB), University of Glasgow,  
10 University Place, Glasgow G12 8QQ, UK

11 <sup>3</sup> International Centre of Insect Physiology and Ecology (ICIPE), P.O. Box 30772,  
12 00100 Nairobi, Kenya

13 <sup>4</sup> Institute of Biodiversity, Animal Health and Comparative Medicine (BAHCM),  
14 Graham Kerr Building, University of Glasgow, University Place, Glasgow G12 8QQ,  
15 UK

16 <sup>5</sup> Institute of Infection Immunity and Inflammation (III), University of Glasgow,  
17 University Place, Glasgow G12 8QQ, UK

18 **Keywords: blood meal, tsetse flies, Trypanosomes, parasites, host, host**  
19 **population structure, African trypanosomiasis.**

20

## 21 **Abstract**

22 Changes in climate and land use can alter risk of transmission of parasites between  
23 domestic hosts and wildlife, particularly when mediated by vectors that can travel  
24 between populations. Here we focused on tsetse flies (genus *Glossina*), the cyclical  
25 vectors for both Human African Trypanosomiasis (HAT) and Animal African  
26 Trypanosomiasis (AAT). The aims of this study were to investigate: 1) the diversity of  
27 vertebrate hosts that flies fed on; 2) whether host feeding patterns varied in relation  
28 to type of hosts, tsetse feeding behaviour, site or tsetse age and sex; and 3) if there  
29 was a relationship between trypanosome detection and host feeding behaviours or  
30 host types. Sources of blood meals of *Glossina pallidipes* were identified by  
31 sequencing of the mitochondrial cytochrome b gene and analyzed in relationship  
32 with previously determined trypanosome detection in the same flies. In an area  
33 dominated by wildlife but with seasonal presence of livestock (Nguruman), 98% of  
34 tsetse fed on single wild host species, whereas in an area including a mixture of  
35 resident domesticated animals, humans and wildlife (Shimba Hills), 52% of flies fed  
36 on more than one host species. Multiple Correspondence Analysis revealed strong  
37 correlations between feeding pattern, host type and site but these were resolved  
38 along a different dimension than trypanosome status, sex and age of the flies. Our  
39 results suggest that individual *G. pallidipes* in interface areas may show higher  
40 feeding success on wild hosts when available but often feed on both wild and  
41 domesticated hosts. This illustrates the importance of *G. pallidipes* as a vector  
42 connecting the sylvatic and domestic cycles of African trypanosomes.

43

44

## 45 Introduction

46 In sub-Saharan Africa, changes in land use increase encroachment of domestic  
47 livestock into areas that are primarily managed to conserve wildlife. This increases  
48 risks that livestock will be exposed to a wider range of parasites, with potentially  
49 important consequences for disease burden and control. Wildlife can represent  
50 'reservoir communities'<sup>31,71</sup> for multi-host pathogens that could spill-over into  
51 domesticated animals. Domesticated animals infected by wildlife pathogen could in  
52 turn show more severe disease, given limited opportunity for host-pathogen  
53 coevolution in novel hosts. This could be particularly true for vector-mediated  
54 transmission, where movement of the vectors could facilitate parasite sharing across  
55 interface areas, even if fences are used to reduce contact between domestic and  
56 wild hosts.

57 One particularly complex system where this could be important to understand is  
58 trypanosome-mediated diseases transmitted by tsetse flies in Africa. Although there  
59 are multiple species of tsetse flies that can transmit multiple species of  
60 trypanosomes, *Glossina pallidipes* is the most economically important species in  
61 East Africa<sup>21</sup>, because it is the main vector of Animal African Trypanosomiasis (AAT)  
62 and it is also a vector of Human African Trypanosomiasis(HAT). Wild animals have  
63 been reported as reservoir hosts both for AAT<sup>3,57</sup> and HAT<sup>25,26,34,73,74</sup> but the extent  
64 of transmission across the wildlife-livestock interface remains unclear.

65 Tsetse flies (genus *Glossina*) are generalist blood-feeders on a wide variety of  
66 vertebrate host species, including mammals, reptiles and birds<sup>72</sup>. Importantly, both  
67 male and female tsetse feed throughout their lifetimes. There is thus high potential  
68 for vector-mediated connection between parasite sylvatic and domestic cycles in  
69 wildlife-livestock interface areas if tsetse flies take meals from different host species

70 at each feeding opportunity. However, the likelihood that an individual tsetse feeds  
71 on different types of hosts where they occur sympatrically, compared to feeding  
72 predominantly on a single species, has not been clearly established and so the  
73 relative risks of increased trypanosome infections in livestock living near wildlife  
74 remains a critical gap in knowledge<sup>6</sup>. Although three trypanosome species are  
75 traditionally associated with the disease in livestock (*T. brucei*, *T. congolense*, and *T.*  
76 *vivax*), a higher diversity has been identified in wildlife<sup>4</sup>, which could potentially  
77 increase risks of disease if transmission from wildlife to domesticated animals is  
78 common.

79 Few studies have attempted to combine investigation of host-feeding patterns of  
80 individual flies, trypanosome infection, and intrinsic factors of tsetse flies distributed  
81 in different regions. Identification of hosts through blood meal analyses is a highly  
82 useful tool that has been used to predict host preferences and feeding behaviours  
83 across a wide range of vectors<sup>24,28,39</sup>. A commonly used approach has been to use  
84 polymerase chain reaction (PCR)-based techniques to amplify and sequence host  
85 DNA from blood meal contents in the guts of fed flies. This has largely been based  
86 on mitochondrial genes due to their high copy number and the extensive databases  
87 available due to their use as universal markers for DNA barcoding<sup>33,42,60</sup>. For  
88 example, in the Serengeti ecosystem in Tanzania, which holds a high number and  
89 wide range of wild animals, an investigation of blood meal composition in tsetse flies  
90 based on sequencing of the *cytB* gene compared to surveys of host density revealed  
91 strong preferences for particular wild hosts, which varied by species of fly (*G.*  
92 *swynnertoni* vs *G. pallidipes*)<sup>5</sup>. This clearly demonstrated the value of relating feeding  
93 patterns to the diversity of hosts present. However, trypanosome prevalence was not  
94 quantified in these studies and domestic hosts were not present in the study area;  
95 so, relative host preferences for wildlife compared to livestock was not determined.

96 Feeding activity, where individual flies feed consecutively on different types of hosts,  
97 could alter relative risk of transmission of trypanosomes. More frequent feeding  
98 might occur, for example, if flies are disrupted while feeding or if they abandon a  
99 host that they perceive to be unsuitable or that shows defensive behaviour<sup>63,68</sup>. The  
100 dominance of nonpreferred hosts in a particular geographic area could thus result in  
101 more frequent host switching and so increased rates of multiple feeding and  
102 potentially higher exposure to a diverse range of parasites. In East Africa, *G.*  
103 *pallidipes* is widespread and has been demonstrated to feed on a wide range of  
104 hosts, including bovines<sup>19,20,54,58,69</sup>, suids<sup>11,58</sup>, elephants<sup>54</sup>, antelopes<sup>1</sup> and cattle<sup>54</sup>.  
105 Warthogs, bushbuck and African buffalo have been suggested as the preferred  
106 hosts<sup>13,19,43,45,54,58</sup> but this varies by geographic region<sup>5,22,54,65,66</sup> and relative  
107 preference for domestic and wild hosts has not been specifically assessed.

108 In a previous study, we established that the prevalence of trypanosomes among  
109 tsetse flies in two regions of Kenya (Nguruman and the Shimba Hills) showed  
110 complex relationships with geographic location, tsetse specific factors (age, sex and  
111 fly species), species of trypanosome and the presence of an endosymbiont<sup>17</sup>. The  
112 main aim of the current study was to assess whether some of the variation in the  
113 detection of trypanosomes across sites could be explained by differences in host  
114 feeding patterns. Specifically, we aimed to determine: 1) the diversity of vertebrates  
115 tsetse fed on at sites where different types of host were present; 2) whether host  
116 feeding patterns varied in relation to type of hosts or intrinsic tsetse factors (i.e. age  
117 and sex); and 3) if there was a relationship between trypanosome detection and host  
118 feeding patterns, host types or tsetse-specific factors.

## 119 **Methods**

### 120 **Sampling and tsetse fly characterisation**

121 The *G. pallidipes* samples are described in Channumsin *et al.*<sup>17</sup>, where details of the  
122 sampling strategy are provided (see Extended data 1<sup>18</sup> for locations of the traps).  
123 NG2G traps baited with acetone and cow urine<sup>15</sup> were used for collecting tsetse flies  
124 from three sites that differ in anticipated levels of relative abundance of livestock and  
125 wildlife, with the sampling effort (number of traps) determined by the relative  
126 abundance of flies in the area. Two sites were sampled in the Shimba Hills National  
127 Reserve (Kwale County, in the coastal region of Kenya), which is a relatively small  
128 (250 km<sup>2</sup>) protected area separated from surrounding agricultural areas by a wildlife  
129 fence. There is extensive habitat for tsetse flies, including on the park boundaries.  
130 Buffalo Ridge is within the fenced wildlife protected area in the middle of a thicket  
131 forest, where many tourists visit all year, while Zungu Luka has a woodland type of  
132 vegetation, and is located on the border of the park close to a permanently human-  
133 inhabited rural area with resident livestock. In contrast, the Nguruman region  
134 contains lowland woodland patches surrounded by open savannah; habitats, which  
135 have been found to host a large number of *G. pallidipes* and *G. longipennis*<sup>16</sup>. The  
136 sampling site (Mukinyo) is at the border of the Olkiramatian group ranch, which is a  
137 wildlife conservancy without fences, where the distribution of domestic and wild  
138 tsetse hosts overlap when livestock are grazed in the area but there is no permanent  
139 human settlement close by.

140 Characteristics of the flies and presence of trypanosomes were previously  
141 determined by Channumsin *et al.*<sup>17</sup>. Sex and species of flies were determined based  
142 on morphological characters. Age was estimated based on a wing fray score where  
143 increased damage indicates increasing age<sup>37</sup>. Whole flies were preserved in 95%

144 ethanol and stored at -20°C. Presence of trypanosomes in mouth parts and  
145 proboscis of the flies collected was determined using general primers targeting the  
146 ITS-1 region of the rDNA array (CF: 5' CCGGAAGTTACCGATATTG 3' and BR: 5'  
147 TTGCTGCGTTCTTCAACGAA 3'<sup>56</sup>, that allow identification of trypanosome species  
148 based on size of amplicons, as described in Channumsin *et al.*<sup>17</sup>. Although multiple  
149 species of tsetse were used in the previous study, here we focused on individuals  
150 identified morphologically as *G. pallidipes* (N = 577) and screened trypanosomes in  
151 DNA that had been extracted from abdomens. All flies sampled were used, rather  
152 than selecting individuals that had appeared to have fed recently.

## 153 **Identification of diversity of hosts and feeding patterns** 154 **from *G. pallidipes* blood meals**

155 We used primers developed by Kocher *et al.*<sup>40</sup> targeting a 359 bp fragment of the  
156 mitochondrial gene cytochrome B (cytb) gene in mammals (Cb1: 5'  
157 CCATCCAACATCTCAGCATG ATGAAA 3' and Cb2: 5'  
158 GCCCCTCAGAATGATATTTGTCCTCA 3') which enabled direct comparison with  
159 two previous studies<sup>4,54</sup> and because they showed more reliable amplification in a  
160 pilot study<sup>75</sup> than primers targeting the mitochondrial cytochrome C oxygenase 1  
161 (CO1) gene (VF1d-t1 and VR1d-t1)<sup>36</sup>. During processing for DNA extractions, in  
162 order to reduce risk of contamination, the dissected tissues were cleaned 2-3 times  
163 with 95% ethanol, then left to dry, before moving to new individual microtubes with  
164 liquid nitrogen for sample crushing and DNA extraction using DNeasy<sup>®</sup> blood and  
165 tissue kits (Qiagen Inc., Paisley, UK). PCR cycling was carried out in 25 µl reaction  
166 mixtures containing: 1X PCR buffer; 0.2 mM dNTP mixture; 1.5 mM MgCl<sub>2</sub> (Thermo  
167 Scientific); 0.5 µM of each primer; 1 unit of *Taq* DNA polymerase (Invitrogen Inc,  
168 Carlsbad, CA., USA); and 2 µl tsetse abdomen DNA template. Samples were pre-

169 heated at 94°C for 5 min, denatured at 94°C for 30 sec, annealed at 55°C for 45 sec,  
170 then extended at 72°C for 30 sec, with 35 cycles of the amplification and a final  
171 extension at 72°C for 10 min<sup>54</sup>. PCR products were visualised using 1.5%  
172 UltraPure™ Agarose gels (Invitrogen, Paisley) with 2% Ethidium Bromide  
173 (Invitrogen, Paisley) in 1X TBE buffer (108 g of Tris Base, 55 g of Boric acid and 40  
174 ml of 0.5 M EDTA). Results were visualised and analysed on a gel documentation  
175 system (UVIpro Platinum, UVITEC, Cambridge, UK or GeneDoc, BioRad Inc, UK).

176 PCR products of the expected size (359 bp) yielding  $\geq 20$  ng were cleaned using  
177 ExoSAP-IT PCR Clean-up Kits (GE Healthcare). In cases where the yield of PCR  
178 products was lower than this threshold, multiple PCR products were concentrated  
179 and QIAquick Gel Extraction Kits (Qiagen Inc, Paisley, UK) were applied to extract  
180 the PCR products from agarose gels. All purified samples were sent for Sanger  
181 sequencing in both forward and reverse directions, using the Sequencing Service at  
182 the University of Dundee (MRC I PPU, School of Life Sciences, University of  
183 Dundee, Scotland, [www.dnaseq.co.uk](http://www.dnaseq.co.uk)) using Applied Biosystems Big-Dye Ver 3.1  
184 chemistry on an Applied Biosystems model 3730 automated capillary DNA  
185 sequencer.

186 Base-calling was manually corrected, sequences were aligned and consensus  
187 sequences for forward and reverse primers for each individual generated using  
188 Sequencher version 5.3 (Gene Codes Corporation, Ann Arbor, MI USA). The Basic  
189 Local Alignment Tool (BLASTn)<sup>2</sup>, was used to identify the closest matching  
190 sequences in the GenBank database to determine the host identity of each  
191 consensus sequence. Chromatographs with only single peaks based on direct  
192 sequences were classified as “single host feeding”. Sequences that were still clearly  
193 readable but showed more than one peak at multiple positions were classified as



194 “multiple host feeding”. While the difficulty of resolving the phase of genetic variants  
195 precluded identification of all hosts from direct sequencing of multiple-peak products,  
196 the dominant host was determined based on BLASTn analysis of the most prominent  
197 peaks.

198 Host-feeding patterns were confirmed in a subset of samples by cloning using  
199 TOPO<sup>®</sup>-TA Cloning Kits (Invitrogen, UK), with at least six plasmids of each sample  
200 sent for sequencing, after purifying using QIAprep Spin Miniprep Kits (Qiagen Inc,  
201 Paisley, UK). Ten samples whose chromatographs showed double or triple peaks at  
202 single positions in the direct sequences were cloned to confirm that multiple peaks  
203 were due to feeding on multiple host species rather than poor quality sequences  
204 (five flies from Buffalo Ridge; three from Zungu Luka; two from Mukinyo). An  
205 additional seven samples that appeared to have fed on single hosts but with some  
206 ambiguous peaks were also cloned and sequenced (five from Buffalo Ridge and two  
207 from Zungu Luka).

208 To enable of assessment of variation in the type of hosts fed on across sites,  
209 dominant hosts resolved were classified as “domestic” (including livestock or  
210 companion animals), “human”, or “wild”.

211 In order to assess infraspecific diversity in hosts fed on across the sites, sequences  
212 were first exported to Se-AL version 2.0<sup>61</sup> to manually align and prune sequences to  
213 the same length. DNAsp version 5.0<sup>47</sup> was then used to resolve variants into unique  
214 haplotypes within host species. Minimum spanning networks were plotted using  
215 PopArt<sup>46</sup>, to indicate relative frequencies of host haplotypes across the sampling  
216 sites.

217

## 218 **Variables influencing tsetse feeding behaviour**

219 Generalised linear models (using the glm function, as implemented in the lme4  
220 package<sup>8</sup> using R version 4.0.2<sup>67</sup> were used to test whether variation in feeding  
221 behaviour of the flies (single vs multiple hosts, modelled as a binary response  
222 variable) was influenced by the type of the dominant host (domestic, human, or  
223 wildlife), tsetse sex and age (sex as a continuous variable based on awing fray score  
224 averaged across the two wings of an individual), or site (Buffalo Ridge, Zungu Luka,  
225 Mukinyo). Interactions between the type of host with sex, age and site were also  
226 considered in the full model. Model selection was performed using likelihood ratio  
227 tests to find the minimum model that best explained the data. Odds ratios were  
228 calculated from the coefficients of the final model using the “oddsratio” package in  
229 R<sup>64</sup>. To check the appropriateness of the binomial model, overdispersion was  
230 assessed by checking that the ratio of the residual deviance to the degrees of  
231 freedom in the final model was below 1. The fit of the final model was assessed by  
232 McFadden’s pseudo- $R^2$ , defined as  $1 - LL(\text{final model})/LL(\text{null model})$ , where LL =  
233 log likelihood<sup>52</sup>.

234

## 235 **Prevalence of *Trypanosoma* spp. in relation to *G.*** 236 ***pallidipes* feeding patterns**

237 A similar statistical approach was used to test whether the presence of  
238 trypanosomes was explained by host type or feeding behaviour while considering  
239 possible influences of fly sex and age, or site based on conclusions from our  
240 previous study<sup>17</sup>. Since we were specifically interested in whether tsetse feeding  
241 behaviour affected trypanosome detection, pairwise interactions were considered  
242 between the type of host and the feeding pattern with age, sex and sampling site of

243 the flies. Model selection and fit were performed as described for the feeding pattern  
244 models. Given the wide range of hosts that the flies feed on, the influence of  
245 particular host species on trypanosome prevalence was considered only  
246 qualitatively.

247 To specifically visualise whether feeding patterns or dominant host types were  
248 related to trypanosome prevalence when accounting for geographic location and  
249 tsetse sex and age, Multiple Correspondence Analysis (MCA), as implemented in  
250 the FactoMineR package (version 1.30<sup>44</sup>) was used. For this analysis, age was  
251 considered as a categorical variable by classifying individuals into the following age  
252 categories: “young” (wing fray score 1–2.5); “juvenile” (3.0–4.0) and “old” (4.5–6.0)  
253 based on the average score between the two wings for each individual. Other  
254 variables were: site, presence or absence of *Trypanosoma spp*, sex, feeding pattern  
255 (single vs multiple) and dominant host type (domestic, human or wild). Variation  
256 along pairs of principal component axes was visualised using “ggplot2()<sup>27</sup> in R<sup>67</sup>.

257

## 258 **Results**

### 259 **Diversity of hosts identified from *G. pallidipes* blood meals**

260 From 573 *G. pallidipes*, 128 flies showed no evidence of a recent blood meal based  
261 on lack of amplification products following screening with the Cb1 and Cb2 primers.  
262 These samples were excluded from analyses (Table 1). The remaining 445 flies  
263 showed amplified products of the expected size, which were sequenced and used to  
264 classify feeding status (Table 1; Extended data 2<sup>18</sup>). For 197 of the 247 samples for  
265 which dominant hosts could be resolved to the species level, a single amplification  
266 product was apparent in the chromatographs; these were classified as having

267 recently fed on a single host. Cloning of seven of these samples confirmed  
268 amplification of DNA from only a single host species (Extended data 2 and 3<sup>18</sup>). The  
269 chromatographs for 53 samples clearly showed multiple peaks that could be  
270 confidently attributed to feeding on multiple hosts rather than poor sequence quality  
271 and the dominant host could be resolved through BLASTn analysis of the strongest  
272 peaks. This represented 37% (Buffalo Ridge), 31% (Zungu Luka) and 51%  
273 (Mukinyo) of the samples screened at the three sites (Table 1). Cloning of 10 of  
274 these PCR products confirmed amplification of DNA from more than one host, with  
275 up to four different host species identified in single flies (Extended data 3<sup>18</sup>).

276 We took a conservative approach to classifying feeding patterns: chromatograms of  
277 the remaining 198 samples from which amplification products were obtained were  
278 not considered of sufficient quality to reliably determine the source of the blood  
279 meals; these were classified as “unidentified”. While many of these would likely  
280 represent multiple feeding, we wanted to avoid confounding with poor sequence  
281 quality so they were classified as fed but not identified (Table 1; Extended data 2<sup>18</sup>);  
282 only samples with confident dominant host calls were included in the statistical  
283 analyses.

284 Host composition of blood meals varied across sites (Table 2), with buffalo  
285 dominating in the two wildlife protected areas (Buffalo Ridge and Mukinyo) and  
286 humans predominating in the site bordering the SHNR (Zungu Luka), where no  
287 buffalo feeds were detected (Figure 2). Mukinyo had a wider range of wild hosts  
288 identified in blood meals than Buffalo Ridge but elephants, antelope and warthog  
289 were found at both sites. Flies from Buffalo Ridge also shared most of the same  
290 domestic host species as Zungu Luka, suggesting that flies moved across the

291 fenced interface to feed. Across all sites, only a single fly (from Mukinyo) was  
292 confirmed to have fed on domestic cattle.

293 **Table 1 Summary of blood meal analysis results based on direct sequencing.** Cytb negative samples were classified as “unfed flies”  
 294 but were not considered in the analyses since they could represent lack of amplification rather than lack of feeding. Single host feeding  
 295 refers to cases where the cytb sequence had only single chromatograph peaks. Multiple host feeding were samples for which cytb was  
 296 amplified but the sequences showed multiple peaks and the dominant sequence could be identified to species, classified as domestic  
 297 animals, humans or wildlife. Flies showing strongly amplified cytb PCR products but for which the number or type of host species could  
 298 not be confirmed due to poor sequencing quality are labelled as “not identified”. The number of flies that tested positive for the presence  
 299 of trypanosomes is indicated in parentheses. The human samples that were potential contaminants (haplotype 1; Figure 3) were  
 300 excluded.

| Site          | Single Feeding |       |          | Multiple Feeding |        |       | Not identified | “Unfed” | Total Screened |
|---------------|----------------|-------|----------|------------------|--------|-------|----------------|---------|----------------|
|               | Domestic       | Human | Wild     | Domestic         | Human  | Wild  |                |         |                |
| Buffalo Ridge | 0              | 1 (1) | 31 (8)   | 9 (5)            | 9 (3)  | 5 (3) | 62 (23)        | 33 (10) | 150 (53)       |
| Zungu Luka    | 1 (1)          | 6 (2) | 8 (5)    | 12 (7)           | 11 (8) | 1 (1) | 60 (31)        | 29 (22) | 128 (77)       |
| Mukinyo       | 1 (1)          | 0     | 146 (60) | 0                | 0      | 3 (2) | 76 (22)        | 66 (20) | 292 (105)      |

301

302

303 **Table 2 Dominant host species resolved from blood meal analysis *G. pallidipes* sampled from the Shimba Hills (Buffalo Ridge**  
 304 **and Zungu Luka) and the Nguruman region of Kenya, based on direct sequencing of cyt**b**.** Homozygous amplicons were classified  
 305 as “single” feeding whereas sequences with multiple peaks were classified as having fed on “multiple” hosts. The dominant host was  
 306 identified based on BLASTn. The relative abundance of the various host species is expressed as the total % of sequences for which the  
 307 dominant host could be identified within that site. Species are ordered by relative abundance of wild and domestic hosts.

| Site               | Buffalo Ridge |          |         | Zungu Luka |          |         | Mukinyo |          |         |
|--------------------|---------------|----------|---------|------------|----------|---------|---------|----------|---------|
|                    | Single        | Multiple | Total % | Single     | Multiple | Total % | Single  | Multiple | Total % |
| Buffalo            | 25            | 3        | 50.9    | 0          | 0        | 0.0     | 105     | 2        | 71.3    |
| Elephant           | 2             | 1        | 5.5     | 1          | 1        | 5.1     | 29      | 1        | 20.0    |
| Antelope           | 2             | 1        | 5.5     | 6          | 0        | 15.4    | 1       | 0        | 0.7     |
| Warthog            | 2             | 0        | 3.6     | 1          | 0        | 2.6     | 5       | 0        | 3.3     |
| Giraffe            | 0             | 0        | 0.0     | 0          | 0        | 0.0     | 4       | 0        | 2.7     |
| Hyaena             | 0             | 0        | 0.0     | 0          | 0        | 0.0     | 2       | 0        | 1.3     |
| Human <sup>a</sup> | 1             | 9        | 18.2    | 6          | 11       | 43.6    | 0       | 0        | 0.0     |
| Goat               | 0             | 7        | 12.7    | 1          | 7        | 20.5    | 0       | 0        | 0.0     |
| Mouse              | 0             | 2        | 3.6     | 0          | 4        | 10.3    | 0       | 0        | 0.0     |
| Chicken            | 0             | 0        | 0.0     | 0          | 1        | 2.6     | 0       | 0        | 0.0     |
| Cattle             | 0             | 0        | 0.0     | 0          | 0        | 0.0     | 1       | 0        | 0.7     |
| Total              | 32            | 23       |         | 14         | 25       |         | 147     | 3        |         |

308 <sup>a</sup> Excluding potential contaminants

309 In addition to identifying just the species of host from the blood meals, we found  
310 intraspecific variation in mtDNA haplotypes within host species (Figure 1; Extended  
311 data 4<sup>18</sup>). Single haplotypes were found for all of the domestic hosts identified:  
312 mouse (*Mus musculus*), chickens (*Gallus gallus*), goat (*Capra hircus*) and cattle (*Bos*  
313 *taurus*). Three human haplotypes were identified, with the majority showing similarity  
314 to cytb sequences identified from tsetse blood meals in the Serengeti, Tanzania  
315 (type 2; n = 21) or Zambia (type 3; n = 3) (Extended data 4<sup>18</sup>). However, three  
316 samples with evidence of only a single host matched an Asian haplotype from  
317 Taiwan (type 1: one from each of the three sites), which is the ethnic origin of the  
318 primary researcher; these three were excluded from analyses because they were  
319 suspected laboratory contaminants. Three additional samples were identified as  
320 human but the sequences were not clean enough to resolve the haplotype because  
321 they were all identified in flies that appear to have fed multiple times. There was  
322 extensive variation in haplotype diversity among the wild hosts but this was not  
323 always related to their relative abundance in the samples (Figure 1; Table 2).



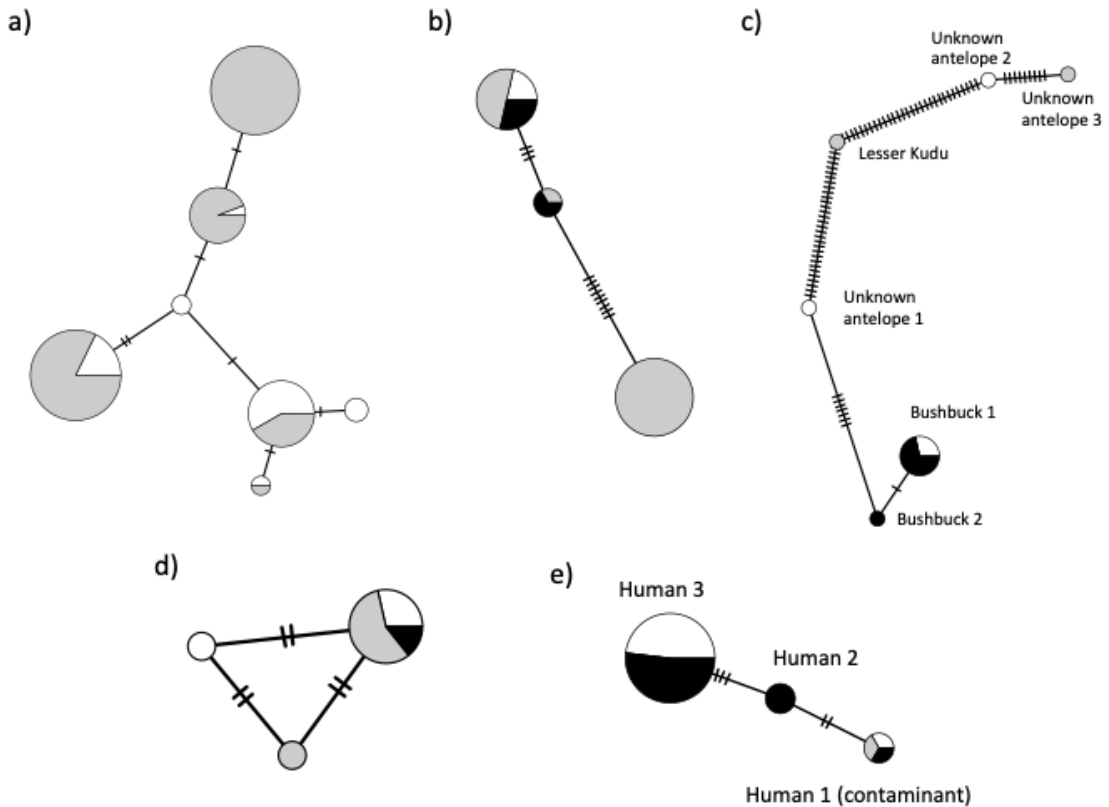

324

325 **Figure 1. Minimum spanning networks indicating intraspecific diversity and**  
326 **relative frequency of haplotypes between populations from this study for: a)**  
327 **buffalo; b) elephants; c) antelope; d) warthogs; and e) humans.** Note that  
328 human type 1 matched the ethnic origin of the main investigator (Asian); samples  
329 with this haplotype were considered as contaminants and excluded from analyses.  
330 The two antelope sequences labelled “unknown” were found only in single clones,  
331 with a more dominant host predominating, and had no close match using BLASTn.  
332 Circle sizes are proportional to the frequency of each haplotype (see Extended data  
333 4<sup>18</sup> for values); notches on branches indicate the number of nucleotide substitutions  
334 separating haplotypes; colours represent the population of origin (white = Buffalo  
335 Ridge; grey = Mukinyo; black = Zungu Luka). Three haplotypes were found in  
336 giraffes but they differed by only single nucleotide and were each found in only one  
337 or two individuals so they are not shown here.

338

339

## 340 **Variables influencing tsetse feeding behaviour**

341 A qualitative summary of variation in feeding behaviours (single vs multiple) of flies  
342 in relation to their sex, age, sample site and type of host fed on is provided in Figure  
343 2. Although there was variation in the sex and age distribution of flies across sites  
344 (Extended data 5<sup>18</sup>), the most striking pattern distinguishing single and multiple  
345 feeding was in relation to differences in the type of hosts fed on.

346 The two sites from the Shimba Hills (Buffalo Ridge and Zungu Luka) showed a  
347 higher proportion of flies that appear to have fed on multiple hosts than the site from  
348 Nguruman (Mukinyo): 41.8% from Buffalo Ridge; 61.5% from Zungu Luka, compared  
349 with 2.0% from Mukinyo. However, this appeared to be influenced by the type of host  
350 (Table 2; Figure 2). Buffalo Ridge showed a predominance of flies that had fed on  
351 wild hosts (65.5%) and most individuals with a dominant domestic or human host  
352 had fed on multiple species (18/19, compared with 5/36 for wild hosts). Cloning  
353 revealed that all five of the individuals classified as multiple feeding had fed on  
354 humans and at least one other domestic animal; four of the individuals had also fed  
355 on a wild host (Extended data 3<sup>18</sup>). In contrast, for Zungu Luka, humans comprised  
356 43% of dominant hosts identified compared with 33% domestic and only 23% wild  
357 animals. Similar to Buffalo Ridge, the majority of flies feeding on non-wild hosts fed  
358 on more than one host species (23/30), compared with only 1/9 of the flies for which  
359 dominant sequences were identified as wild hosts. All three multiple feeding flies  
360 cloned from this site had fed on humans, with one also having fed on both domestic  
361 (goat, mouse) and wild (antelope) hosts, one on a single wild host (bushbuck) and  
362 another on a domestic host (chicken) (Extended data 3<sup>18</sup>). At Mukinyo, 99% of flies  
363 had fed on wild hosts, with only a single fly identified as having recently fed on a  
364 domestic host (identified as single feeding on cattle) and no human hosts were

365 detected. Moreover, only 3/149 flies with dominant wild hosts had fed on more than  
366 one host species (confirmed by cloning for two of the individuals; Extended data 3<sup>18</sup>).

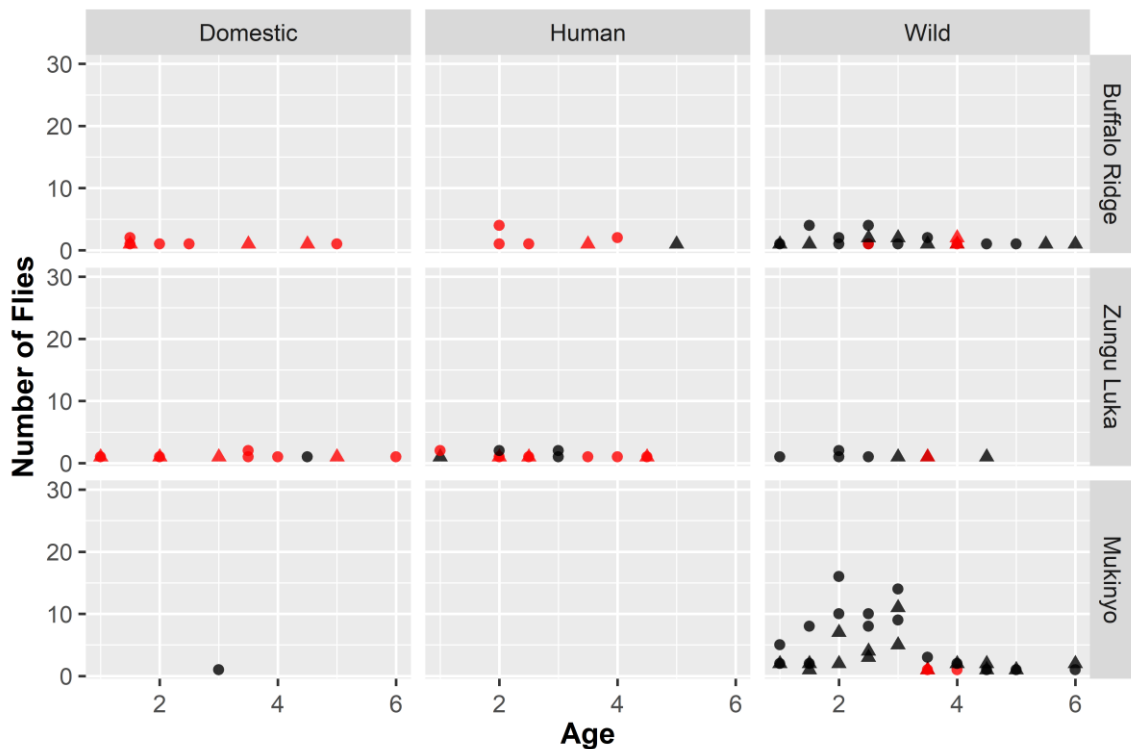

367

368 **Figure 2 Feeding patterns of flies across sites in relation to their age, sex, and**  
369 **dominant host type (domestic, human, wild).** Age of flies was estimated based on  
370 average wing fray scores across the two wings or an individual fly, with increasing  
371 damage indicating relatively older flies. Feeding patterns were based on whether  
372 sequence chromatograms indicated amplification of a blood meal from a single host  
373 (black) or more than one host (red); the sex of the flies was determined visually  
374 (female = circles; male = triangles). Only values greater than 0 have been plotted.  
375 Flies from all age classes at Mukinyo fed predominantly on single wild host species,  
376 with no evidence of feeding on humans and only a single mid-age female feeding on  
377 a domestic cow. In contrast, feeding on a mixture of domestic and wild hosts was  
378 found for all age classes at the Shimba Hills sites, Buffalo Ridge and Zungu Luka  
379 and multiple feeding was more frequent than single feeding, except for wild hosts.

380 Using the type of feeding behaviour (single vs multiple hosts) as a binary response  
381 variable, the final model selected by maximum likelihood included a highly significant  
382 effect of type of host (LRT:  $\chi^2=52.0$ ,  $df=2$ ,  $p=5.09e-12$ ) and a significant effect of  
383 site (LRT:  $\chi^2=13.2$ ,  $df=5$ ,  $p=0.001$ ). Examining the odds ratios (OR) indicated a  
384 substantially lower incidence of multiple feeding on wild compared to domestic hosts  
385 (OR = 0.009; CI = 0.001-0.045) but similar incidence in humans and domestic hosts  
386 (OR = 0.232; CI = 0.031-1.151). As might be expected based on the difference in  
387 distribution of hosts, Mukinyo showed lower levels of multiple feeding (OR = 0.081;  
388 CI = 0.014-0.323) than Buffalo Ridge, whereas there was little difference between  
389 the two Shimba Hill sites (OR = 0.407; CI = 0.081-1.528). Comparing the residual  
390 deviance (104.12 on 239 df) and null deviance (247.49 on 243 df) indicated that  
391 there was no evidence for over-dispersion and McFadden's pseudo- $R^2$  was 0.58,  
392 indicating a relatively good fit to the data that the final model explained.

### 393 **Prevalence of *Trypanosoma* spp. in relation to *G.*** 394 ***pallidipes* feeding patterns**

395 Across sites, 44% ( $n=107$ ) of the flies for which hosts could be identified to species  
396 tested positive for trypanosomes with 54% (29/53) associated with dominant  
397 domestic hosts and 41% (79/194) with wild (Table 1). Of flies feeding on multiple  
398 hosts, 58% tested positive for trypanosomes, compared to 40% that had fed on  
399 single hosts, but this was influenced by the higher rate of infection in Zungu Luka  
400 (61.5%), where single feeding was rare, compared to in Buffalo Ridge (36%) and  
401 Mukinyo (42%). It was more difficult to interpret patterns by host species because of  
402 the large differences in their relative abundance (Extended data 6<sup>18</sup>).

403 As found in our previous study<sup>17</sup>, generalised linear models using trypanosome  
404 presence as a response variable were difficult to interpret. All of the interactions  
405 considered except for that between feeding pattern and site significantly explained  
406 variation in trypanosome detection ( $p < 0.01$ ). However, testing the fit of the final  
407 model based on pseudo- $R^2$  (0.08) indicated that only a small amount of the variation  
408 in trypanosome presence was explained. The residual deviance (303.22 on 225 df)  
409 also suggested over dispersion.

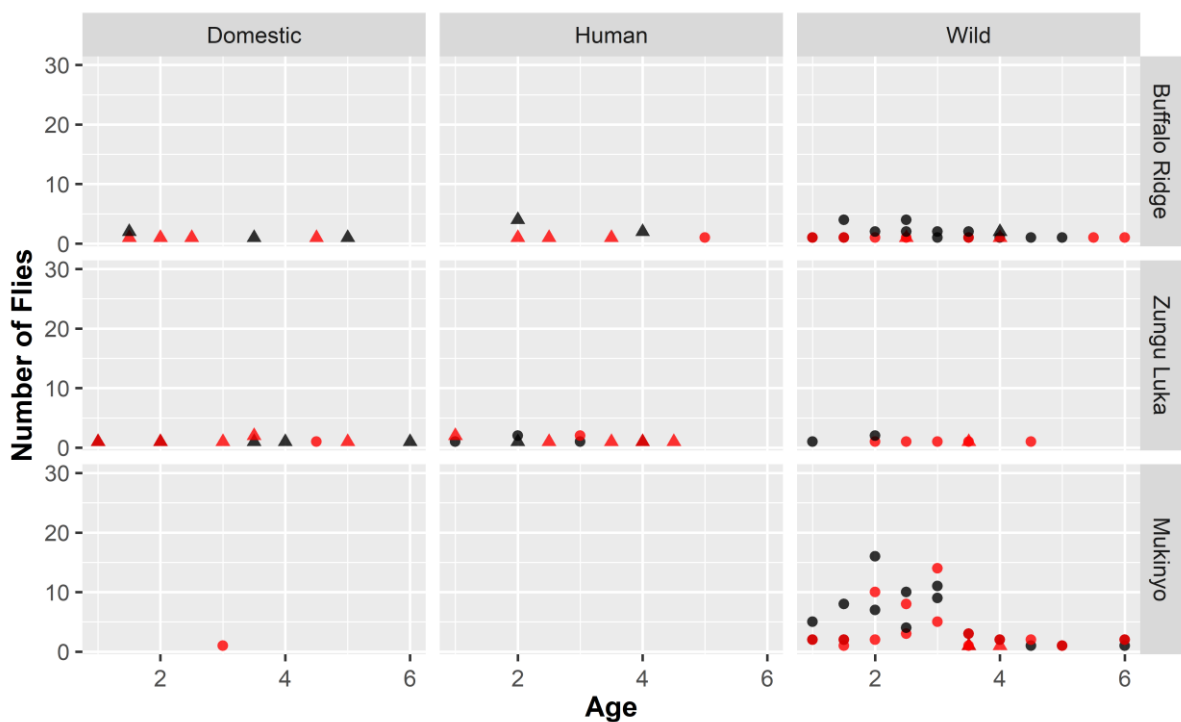

410

411 **Figure 3 Detection of trypanosomes across sites in relation to fly feeding**  
412 **behaviour, age and site.** Trypanosome detection (black = negative, red = positive)  
413 is indicated in relation to feeding pattern (circle = single, triangle = multiple), with  
414 separate plots by type of host and site. Generalised linear mixed models indicated  
415 multiple significant pairwise interactions between feeding behaviours and other  
416 tsetse-specific variables. Sex was involved in a significant interaction with type of  
417 host but not feeding pattern, but it has been excluded here to more clearly  
418 demonstrate the complicated interactions between the other variables.

419 For this reason, multivariate ordination analyses were used to visualise associations  
420 between variables. Based on MCA analyses, strong correlations among site of *G.*  
421 *pallidipes* collection, host feeding pattern and type of host were apparent in  
422 dimension 1 (Figure 4; Extended data 7<sup>18</sup>). In contrast, trypanosome status was  
423 resolved primarily along dimensions 2 and 3, as were sex and age of the flies; a  
424 positive association was found between trypanosome positive samples and juvenile  
425 male flies, while trypanosome negative flies tended to be found in young female flies.

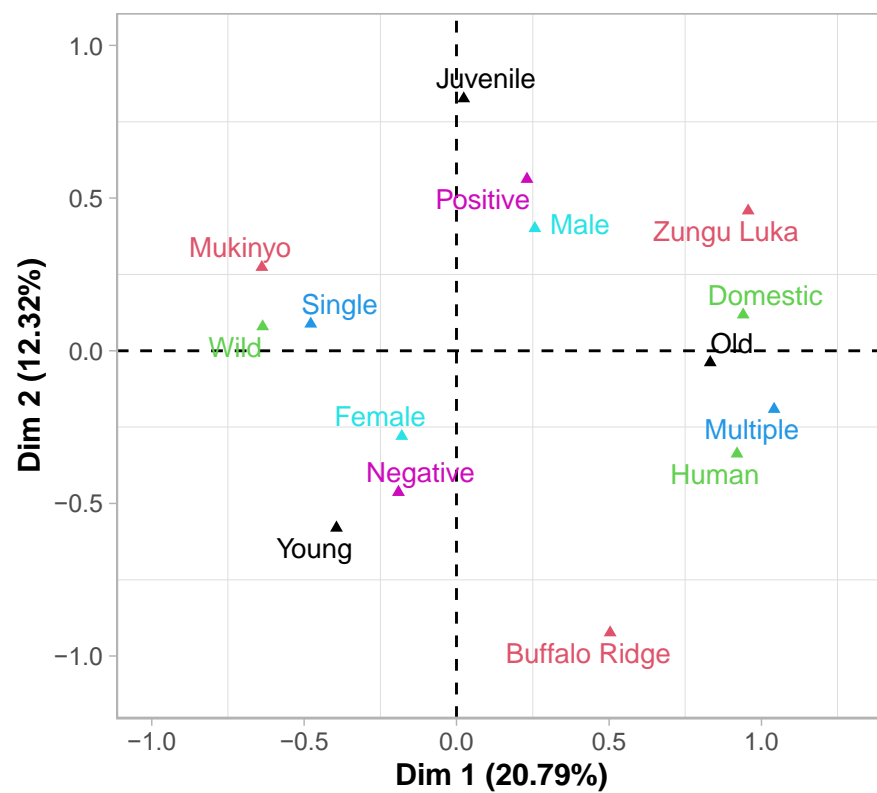

426

427 **Figure 4 Multiple Correspondence Analysis (MCA)**, showing associations of  
428 dimension 1 (Dim 1; 29.79 % of the variance) and 2 (Dim 2; 12.32% of the variance)  
429 in relation to age category (young, juvenile, old), feeding pattern (single or multiple),  
430 host type (domestic or wildlife), sex (male or female), site (Buffalo Ridge, Zungu  
431 Luka or Mukinyo), and *Trypanosoma spp.* status (positive or negative). This Figure  
432 clearly shows the strong association between feeding pattern and host type, driven  
433 by the differences in fly behaviour at Mukinyo compared to Zungu Luka resolved  
434 along dimension 1. Old flies were also highly correlated with multiple feeding of  
435 domestic and human hosts at Zungu Luka Trypanosome status was not explained

436 by variation along dimension 1 but was more related to sex and age of younger flies  
437 resolved along dimension 2. Buffalo Ridge was differentiated from the other two  
438 populations along both dimensions 1 and 2.

439

## 440 **Discussion**

441 Based on detailed sequence analysis of mitochondrial gene amplicons, our results  
442 suggest that individual tsetse flies (*G. pallidipes*) vary markedly in their feeding  
443 patterns. In particular, we found that flies feeding on wild hosts tended to show  
444 higher feeding success (based on evidence for amplification of only a single host  
445 species in blood meals) than those feeding on domestic animals and humans.  
446 Although site also influenced patterns of feeding, this was somewhat confounded by  
447 the relative abundance of wild hosts that were fed on between the two regions  
448 compared. Although previous studies have found a similar diversity of hosts as we  
449 found based on analyses using the same cytochrome b primers<sup>40</sup> or other mtDNA  
450 regions<sup>54</sup>, we are not aware of other studies that differentiated single from multiple  
451 feeding based on analysis of sequence chromatograms. Moreover, blood meal  
452 analyses do not typically assess within-host diversity; our haplotype analysis  
453 suggests that there is potential to use feeding arthropods as “flying syringes”<sup>12</sup> not  
454 only for identification of hosts but also could be used to make inferences about host  
455 population structure. Our results were not able to clearly test whether host feeding  
456 patterns or type of host influenced prevalence of trypanosomes in individual flies. As  
457 in our previous study<sup>17</sup>, trypanosome presence was explained by interactions  
458 between multiple variables. We had hypothesised that some of this complexity might  
459 be reduced by including feeding behaviours, but they also were found to influence  
460 variation dependent on other variables. Multivariate analysis using MCA suggested  
461 that prevalence of trypanosomes was correlated with sex and age of the flies  
462 whereas feeding pattern was correlated with type of host and geographic location.

463 Together, these results suggest that differences in host communities in different  
464 regions could influence the risk of transmission between vectors and hosts in  
465 complex ways and highlight the potential for increased transmission risk in interface  
466 areas where both livestock and domestic hosts coexist.

## 467 **Host diversity in *G. pallidipes* blood meals**

468 We identified the dominant hosts for 46% of the *G. pallidipes* samples screened  
469 (56% of the samples that showed positive amplification products), which is  
470 comparable or higher than previous studies using the same primers<sup>5,12</sup>. We found  
471 extensive variation among the species fed on in two different geographic areas. In  
472 the Shimba Hills, where a fenced wildlife protected area is located within a few km of  
473 human settlements, flies fed on both domestic and wild hosts, with blood meals from  
474 both host types detectable within individual flies. In contrast, in the Nguruman region,  
475 only a single fly was identified that had fed on a domestic host. This is consistent  
476 with Muturi *et al.*<sup>54</sup>, who also did not identify domestic hosts in their survey of the  
477 Nguruman region, despite finding predominantly cattle blood meals at a site  
478 surveyed in Uganda. The results from Nguruman may be due to sampling time and  
479 the large-scale shifts in cattle grazing sites according to season (Masiga,  
480 unpublished). Snow *et al.*<sup>65</sup> suggested that, even though flies in areas dominated by  
481 cattle fed readily on these domestic hosts, a positive correlation between the number  
482 of wild herbivores and the abundance of *G. pallidipes* suggested that feeding  
483 success was poor on local livestock (based on a low density of flies where cattle  
484 were numerous). The use of insecticides on cattle also could help to explain  
485 decreased density of tsetse traversing from wildlife-protected areas through to  
486 livestock dominated areas in interface areas<sup>48,49</sup>



487 Surprisingly, no domestic cattle were detected in our study from the Shimba Hills,  
488 despite the proximity to settlements with mixed herds of cattle, sheep and goats<sup>55</sup>.  
489 However, domestic hosts were also not identified in the Shimba Hills region in a  
490 previous study based on host detection using haemagglutinin assays<sup>65</sup>. This could  
491 indicate that flies avoid cattle when more favourable hosts are present. However,  
492 there also could be seasonal differences, as trypanosome prevalence in cattle was  
493 found to be high (33.9%) in Kwale County, in a previous study that also found *G.*  
494 *pallidipes* at high abundance<sup>51</sup>. At Mukinyo a single individual fed on domestic cattle  
495 but there was a very low proportion of flies that fed on multiple hosts (2%) and a  
496 predominance of buffalo (71%) among the samples where the dominant host could  
497 be identified. It is possible that buffalo are abundant hosts that are easy to feed on  
498 and so flies could learn to return to the same host species<sup>14</sup>. Our results in general  
499 are consistent with higher feeding success on wild compared to domestic hosts.

500 Our finding of African buffalo as the main hosts of *G. pallidipes* in Nguruman and  
501 Buffalo Ridge supports previous reports that ruminants are attractive to adult *G.*  
502 *pallidipes*, *G. fuscipes* and *G. brevipalpis*<sup>1,30</sup>. However, host selection has been  
503 found to vary extensively by population (Extended data 7<sup>18</sup>). Differences across  
504 studies could be due to differences in methodology but also could be due to  
505 microhabitat differences<sup>66</sup>, such as seasonal variation in host availability, the  
506 vegetation type or cover at particular sites, or particular environmental conditions in  
507 different years, which affects overlap of habitat and activities between tsetse flies  
508 and hosts<sup>1,19</sup>. It is interesting that no buffalo blood meals were detected at Zungu  
509 Luka, despite its close proximity (~ 20 km) to Buffalo Ridge, where buffalo are  
510 abundant. This could suggest that flies feeding in human settlements move into the  
511 park to feed on wildlife but once feeding on their preferred wildlife, they do not move  
512 out into the human-settled regions or that flies tend to dwell proximally to where

513 bloodmeals are readily available. It would be interesting to quantify relative  
514 abundance of hosts of different types and directionality of movements to test this  
515 hypothesis. Specific choice tests between domestic and wild hosts also could reveal  
516 important information about preferences that could inform control interventions<sup>70</sup> as  
517 has been done for malaria-carrying mosquitos<sup>50</sup>. Nevertheless, the finding of flies  
518 collected in the same traps feeding on both wild and domestic hosts emphasizes the  
519 high potential for cross- feeding between these host types when they occur  
520 sympatrically.

521 Humans have been suggested as inappropriate hosts because they camouflage  
522 their odours, apply chemical repellents, and react strongly to tsetse bites, which  
523 could result in unsuccessful feeding<sup>9,10,29</sup> that could lead to host switching.  
524 Hargrove<sup>29</sup> found that the presence of humans not only repelled tsetse flies but also  
525 inhibited the landing response to approach other potential hosts nearby. Most of the  
526 mtDNA haplotypes we identified from human samples were consistent with those  
527 expected regionally and one haplotype was shared with previous published  
528 sequences from the Serengeti (Auty et al. 2016a; Extended data 4<sup>18</sup>); we also did  
529 not find evidence of feeding on humans in Mukinyo. Although measures were taken  
530 to rule out contamination, these results are surprising and patterns of tsetse feeding  
531 in areas of higher human density should be investigated further.

## 532 **Variables influencing tsetse feeding behaviour**

533 We found that the propensity for feeding on single compared to more than one host  
534 species was highly influenced by the type of host fed on, with more single feeding on  
535 wild hosts than on humans or domestic host. Cloning and sequencing revealed that  
536 some flies feeding on domestic or human hosts had fed on up to four different host  
537 species and confirmed that single feeding was more common in flies feeding on

538 wildlife. Theoretically, the number of clones could be used to predict which host was  
539 last fed on, but this would also depend on the rate of feeding of the fly (e.g. if they  
540 were interrupted and switched hosts very rapidly, more than one blood meal might  
541 have a similar DNA concentration) and lack of bias in PCR amplifications. There also  
542 could be behavioural differences that could result in detection biases: 1) flies might  
543 feed more thoroughly on their preferred hosts (such as buffalo), increasing the blood  
544 meal volume from that host; 2) flies might feed multiple times on the same host  
545 species occurring at high local densities (suggested here by the presence of multiple  
546 haplotypes of the same host species in some cases); or 3) hosts might differ in  
547 effective defence mechanisms, resulting in low blood meal volumes due to  
548 interrupted feeding<sup>68</sup>. If feeding on an initial host is interrupted or too low quality  
549 (“unsuccessful”), flies might switch hosts. Unsuccessful feeding of tsetse flies on  
550 cattle have been attributed to host defence, such as twitching the skin, flicking the  
551 tail, flicking the ears, and kicking or stamping<sup>63</sup>. Wild animals might react less to  
552 tsetse flies feeding and/or be surrounded by less other biting insects than  
553 domesticated animals. Nevertheless, our results suggest higher host fidelity (or  
554 feeding success) when feeding on wild, compared to domestic, hosts.

555

## 556 **Prevalence of *Trypanosoma* spp.**

557 There was not a clear association between prevalence of trypanosomes and type of  
558 host or host-feeding patterns in the tsetse flies. In our previous study Channumsin *et*  
559 *al.*<sup>17</sup>, we found that trypanosome prevalence was explained by complicated  
560 interactions between age, sex and sampling site of the tsetse flies. Here we found  
561 that detection of trypanosomes was also significantly influenced by interactions with  
562 these tsetse-specific variables with both host type and feeding patterns. This made it  
563 difficult to test our hypothesis that the tsetse feeding behaviour might explain some  
564 of the variation in trypanosome detection. Specifically, we hypothesised that feeding

565 on multiple hosts could increase risk of trypanosome infection in flies. However, this  
566 was not apparent in the multivariate analysis using MCA (Figure 4) suggested a  
567 stronger correlation among feeding pattern, host type and site than with  
568 trypanosome status, sex and age of tsetse flies. The blood meals we analysed also  
569 only reflect the most recent feeds and so likely do not reflect their overall feeding  
570 history. Bouyer *et al.*<sup>14</sup>, suggested that repeated feeding on the same host species  
571 was likely to increase risk of trypanosome transmission within species, but to  
572 decrease risk between species. There is some evidence that trypanosome infection  
573 might influence feeding success and feeding behaviour of the flies, but it is not  
574 conclusive<sup>45</sup>. For example, high numbers of *T. congolense*, which attach to the  
575 cuticle of the proboscis, could interrupt feeding and result in more frequent probing<sup>38</sup>.  
576 Alternatively, nutritional status of the flies could affect their relative susceptibility to  
577 trypanosome establishment<sup>41</sup>. Thus, an association between the frequency of  
578 feeding and trypanosome infection status should be further studied in laboratory  
579 experiments to test whether trypanosome infection causes a feeding pattern change  
580 or differences in feeding patterns promote trypanosome infection. Nevertheless, our  
581 results did not suggest an increased prevalence of trypanosomes in communities  
582 where both domestic and wild hosts were fed on that would suggest increased risks  
583 in livestock interface regions.

## 584 **Amplicon-based blood meal analyses**

585 Although blood meal analyses provide a powerful tool for investigating feeding  
586 behaviours of haemotophagous insects, the potential for biases in any PCR-based  
587 approach deserves consideration. For example, we found that a higher proportion of  
588 hosts could be resolved from Mukinyo than the other areas, which could be due to  
589 the dominance of wild hosts but could also be due to higher fidelity of the primers

590 used on the species of hosts detected. Previous studies comparing the relative  
591 reliability of *cytb* and COI mtDNA e.g. Muturi *et al.*<sup>54</sup> have found that neither alone  
592 amplifies products from all potential host types present. In the Shimba Hills, although  
593 goats were identified from flies sampled from both sites, there were also additional  
594 samples that matched goats in BLAST analyses that were not included in the  
595 analysis because it was difficult to determine whether the sequences represented  
596 multiple feeding or just poor sequence quality. Moreover, blood meal analyses rely  
597 on completeness of reference databases. We found several cytochrome *b*  
598 haplotypes that were closest to antelope in BLAST but the similarity was too low to  
599 resolve to species (93%); this lack of reference sequences could have led to  
600 underestimates of host usage in previous blood meal analyses. Analyses of blood  
601 meals also do not typically consider the possibility of amplification of nuclear copies  
602 of mitochondrial genes (numts), the presence of which can vary dramatically across  
603 vertebrate species<sup>32</sup>. It was for these reasons that we took a conservative approach  
604 to interpreting feeding patterns based on blood meals by only considering  
605 sequences where the dominant host could be clearly identified by direct sequencing  
606 (or cloning), While this meant that we likely underestimated the rate of feeding on  
607 multiple host species, a clear pattern remained that fewer ambiguous sequences  
608 were found at Mukinyo, where wild hosts dominated, than at the other sites (26% vs  
609 44%, respectively).

610 There has been a recent shift towards using deep sequencing approaches for  
611 amplicon-based host identification<sup>35,62</sup>, which would allow more rigorous testing of  
612 potential biases and could also allow simultaneous targeting of hosts and  
613 trypanosomes by using multiplexed approaches<sup>23</sup>. Non-PCR based assays such as  
614 high-resolution melting point analysis have already shown high promise as  
615 alternatives for blood meal analysis<sup>22,59</sup>. However, deep sequencing following

616 enrichment approaches rather than PCR amplification, such as hybrid sequence  
617 capture<sup>7,53</sup>, have the potential to not only provide a more comprehensive analysis of  
618 host diversity, but could allow clearer interpretation of relative read numbers in  
619 relation to feeding patterns.

620

## 621 **Conclusions**

622 Identification of the hosts that *G. pallidipes* fed on based on direct PCR sequencing  
623 revealed evidence for both use of a wide range of hosts and multiple feeding bouts  
624 by individual flies. However, in wildlife dominated areas, there was a much stronger  
625 tendency for flies to feed on single host species compared to sites where domestic  
626 hosts were more commonly fed on, with individual flies feeding on up to four different  
627 detectable host species. If this indicates that domestic animals are not preferred  
628 hosts, this could have important implications for understanding risk of transmission  
629 of trypanosomes between wildlife and livestock in interface areas. Our results also  
630 demonstrate the value of detailed sequence analysis of blood meals of  
631 haematophagous insects to include not only identification of the host species but  
632 patterns of feeding by individual flies in relation to their sex, age and habitat. The  
633 increased accessibility of deep sequencing approaches opens up new possibilities  
634 for more detailed assessments, which might also include the ability to predict the  
635 timing or success of feeding on different hosts based on relative read depths.

## 636 **Data Availability**

637 Sequences have been deposited to Genbank, with accession numbers MN148732-  
638 MN148768 (Extended data 4<sup>18</sup>).

## 639 **Acknowledgments**

640 This work was funded by the Wellcome Trust (grant number: 093692) to the  
641 University of Glasgow. For the purpose of Open Access, the author has applied a  
642 CC BY public copyright licence to any Author Accepted Manuscript version arising  
643 from this submission. The authors are grateful to the Kenya Wildlife Service for  
644 permission to perform this study in protected areas. Esther Waweru and James Kabii  
645 provided technical and administrative assistance at *icipe*. James Kabii, Moses Tanju,  
646 Loya Suleyman, John Andoke (deceased) and his team (*icipe*) provided invaluable  
647 expertise and help for the trapping of tsetse. We thank DNA Sequencing & Services  
648 (MRC I PPU, School of Life Sciences, University of Dundee, Scotland,  
649 [www.dnaseq.co.uk](http://www.dnaseq.co.uk)) for DNA sequencing. The comments from three anonymous  
650 reviewers on a previous draft substantially improved the manuscript.

651

## 652 References

- 653 1. Allsopp R, Baldry DAT, Rodrigues C. The influence of game animals on the  
654 distribution and feeding habits of *Glossina pallidipes* in the Lambwe  
655 Valley. *B World Health Organ.* 1972; 47(6):795-809.
- 656 2. Altschul SF, Gish W, Miller W, *et al.*: Basic Local Alignment Search Tool. *J Mol*  
657 *Biol.* 1990; 215(3):403-10.
- 658 3. Anderson NE, Mubanga J, Fevre EM, *et al.*: Characterisation of the Wildlife  
659 Reservoir Community for Human and Animal Trypanosomiasis in the  
660 Luangwa Valley, Zambia. *Plos Neglect Trop D.* 2011; 5(6)
- 661 4. Auty H, Anderson NE, Picozzi K, *et al.*: Trypanosome diversity in wildlife  
662 species from the serengeti and Luangwa Valley ecosystems. *PLoS Negl*  
663 *Trop Dis.* 2012; 6(10):e1828.
- 664 5. Auty H, Cleaveland S, Malele I, *et al.*: Quantifying heterogeneity in host-  
665 vector contact: tsetse (*Glossina swynnertoni* and *G. pallidipes*) host  
666 choice in Serengeti National Park, Tanzania. *PLoS One.* 2016;  
667 11(10):e0161291.
- 668 6. Auty H, Morrison LJ, Torr SJ, *et al.*: Transmission dynamics of Rhodesian  
669 sleeping sickness at the interface of wildlife and livestock areas. *Trends*  
670 *in Parasitology.* 2016; 32(8):608-21.
- 671 7. Barrow LN, Allen JM, Huang X, *et al.*: Genomic sequence capture of  
672 haemosporidian parasites: Methods and prospects for enhanced study of  
673 host-parasite evolution. *Molecular Ecology Resources.* 2019; 19(2):400-10.
- 674 8. Bates D, Mächler M, Bolker B, *et al.*: Fitting Linear Mixed-Effects Models Using  
675 *lme4.* *Journal of Statistical Software.* 2015; 67(1):1-48.
- 676 9. Baylis M. Effect of defensive behaviour by cattle on the feeding success and  
677 nutritional state of the tsetse fly, *Glossina pallidipes* (Diptera:  
678 *Glossinidae*). *Bulletin of Entomological Research.* 1996; 86(4):329-36.
- 679 10. Baylis M, Nambiro CO. The effect of cattle infection by *Trypanosoma*  
680 *congolense* on the attraction, and feeding success, of the tsetse fly  
681 *Glossina pallidipes*. *Parasitology.* 1993; 106 ( Pt 4)(4):357-61.
- 682 11. Bett B, Irungu P, Nyamwaro SO, *et al.*: Estimation of tsetse challenge and its  
683 relationship with trypanosomosis incidence in cattle kept under pastoral  
684 production systems in Kenya. *Veterinary Parasitology.* 2008; 155(3-4):287-  
685 98.
- 686 12. Bitome-Esson PY, Ollomo B, Arnathau C, *et al.*: Tracking zoonotic pathogens  
687 using bloodsucking flies as 'flying syringes'. *Elife.* 2017; 6
- 688 13. Boakye DA, Tang J, P. T, *et al.*: Identification of bloodmeals in  
689 haematophagous Diptera by cytochrome B heteroduplex analysis.  
690 *Medical and veterinary entomology.* 1999; 13:282-87.
- 691 14. Bouyer J, Pruvot M, Bengaly Z, *et al.*: Learning influences host choice in  
692 tsetse. *Biology Letters.* 2007; 3:113-16.
- 693 15. Brightwell R, Dransfield RD, Kyorku C. Development of a low-cost tsetse trap  
694 and odour baits for *Glossina pallidipes* and *G. longipennis* in Kenya.  
695 *Medical and veterinary entomology.* 1991; 5(153-164)
- 696 16. Brightwell R, Dransfield RD, Stevenson P, *et al.*: Changes over twelve years in  
697 populations of *Glossina pallidipes* and *Glossina longipennis* (Diptera:  
698 *Glossinidae*) subject to varying trapping pressure at Nguruman, south-  
699 west Kenya. *Bulletin of Entomological Research.* 1997; 87:349-70.
- 700 17. Channumsin M, Ciosi M, Masiga D, *et al.*: *Sodalis glossinidius* presence in wild  
701 tsetse is only associated with presence of trypanosomes in complex



- 702 interactions with other tsetse-specific factors. *BMC Microbiology*. 2018;  
703 18(1):163.
- 704 18. Channumsin M, Ciosi M, Masiga DK, *et al.*: Supplementary Information for  
705 Blood meal analysis of tsetse flies (*Glossina pallidipes*: Glossinidae)  
706 reveals higher host fidelity on wild compared with domestic hosts. 2021;
- 707 19. Clausen PH, Adeyemi I, Bauer B, *et al.*: Host preferences of tsetse (Diptera:  
708 *Glossinidae*) based on bloodmeal identifications. *Medical and veterinary*  
709 *entomology*. 1998; 12(2):169-80.
- 710 20. England EC, Baldry DAT. The hosts and trypanosome infection rates of  
711 *Glossina pallidipes* in the Lambwe and Roo valleys. *B World Health*  
712 *Organ*. 1972; 47(6):785-88.
- 713 21. England EC, Baldry DAT. Observations on relative attractiveness to *Glossina*  
714 *pallidipes* of different animal baits, a tsetse Trap, and a fly-round patrol.  
715 *B World Health Organ*. 1972; 47(6):789-93.
- 716 22. Farikou O, Njiokou F, Simo G, *et al.*: Tsetse fly blood meal modification and  
717 trypanosome identification in two sleeping sickness foci in the forest of  
718 southern Cameroon. *Acta Tropica*. 2010; 116(1):81-88.
- 719 23. Gaithuma A, Yamagishi J, Hayashida K, *et al.*: Blood meal sources and  
720 bacterial microbiome diversity in wild-caught tsetse flies. *Scientific*  
721 *Reports*. 2020; 10(1):5005.
- 722 24. Garipey TD, Lindsay R, Ogden N, *et al.*: Identifying the last supper: utility of  
723 the DNA barcode library for bloodmeal identification in ticks. *Molecular*  
724 *Ecology Resources*. 2012; 12(4):646-52.
- 725 25. Geigy R, Kauffman.M, Jenni L. Wild Mammals as Reservoirs for Rhodesian  
726 Sleeping Sickness in Serengeti, 1970-71. *T Roy Soc Trop Med H*. 1973;  
727 67(2):284-86.
- 728 26. Geigy R, Mwambu PM, Kauffman.M. Sleeping sickness survey in Musoma  
729 District, Tanzania. IV. Examination of wild mammals as a potential  
730 reservoir for *T. rhodesiense*. *Acta Tropica*. 1971; 28:211-20.
- 731 27. Ginestet C. ggplot2: Elegant Graphics for Data Analysis. *J R Stat Soc a Stat*.  
732 2011; 174:245-45.
- 733 28. Haouas N, Pesson B, Boudabous R, *et al.*: Development of a molecular tool for  
734 the identification of leishmania reservoir hosts by blood meal analysis in  
735 the insect vectors. *Am J Trop Med Hyg*. 2007; 77(6):1054-59.
- 736 29. Hargrove JW. The effect of human presence on the behaviour of tsetse  
737 (*Glossina spp.*) (Diptera, *Glossinidae*) near a stationary ox. *Bulletin of*  
738 *Entomological Research*. 1976; 66(1):173-78.
- 739 30. Harraca V, Syed Z, Guerin PM. Olfactory and behavioural responses of tsetse  
740 flies, *Glossina spp.*, to rumen metabolites. *Journal of Comparative*  
741 *Physiology A*. 2009; 195(9):815-24.
- 742 31. Haydon DT, Cleaveland S, Taylor LH, *et al.*: Identifying Reservoirs of  
743 Infection: A Conceptual and Practical Challenge. *Emerging Infectious*  
744 *Diseases*. 2002; 8(12):1468-73.
- 745 32. Hazkani-Covo E, Zeller RM, Martin W. Molecular poltergeists: mitochondrial  
746 DNA copies (numts) in sequenced nuclear genomes. *PLoS genetics*. 2010;  
747 6(2):e1000834.
- 748 33. Hebert PDN, Cywinska A, Ball SL, *et al.*: Biological identifications through  
749 DNA barcodes. *Proceedings of the Royal Society of London Series B-*  
750 *Biological Sciences*. 2003; 270(1512):313-21.
- 751 34. Heisch RB, McMahon JP, Mansonbahr PE. The isolation of *Trypanosoma*  
752 *rhodesiense* from a bushbuck. *Br Med J*. 1958; 2(5106):1203-04.

- 753 35. Hoffmann C, Stockhausen M, Merkel K, *et al.*: **Assessing the feasibility of fly**  
754 **based surveillance of wildlife infectious diseases.** *Scientific Reports.*  
755 2016; 6:37952.
- 756 36. Ivanova NV, zemplak TS, Hanner rH, *et al.*: **Universal primer cocktails for fish**  
757 **DNA barcoding.** *Molecular Ecology Notes.* 2007; 7:544-48.
- 758 37. Jackson CHN. **An artificially isolated generation of tsetse flies (*Diptera*).**  
759 *Bulletin of Entomological Research.* 1946; 37(02):291-99.
- 760 38. Jenni L, Molyneux DH, Livesey JL, *et al.*: **Feeding-behavior of tsetse flies**  
761 **infected with Salivarian trypanosomes.** *Nature.* 1980; 283(5745):383-85.
- 762 39. Kent RJ. **Molecular methods for arthropod bloodmeal identification and**  
763 **applications to ecological and vector-borne disease studies.** *Molecular*  
764 *Ecology Resources.* 2009; 9(1):4-18.
- 765 40. Kocher TD, Thomas WK, Meyer A, *et al.*: **Dynamics of mitochondrial DNA**  
766 **evolution in animals: amplification and sequencing with conserved**  
767 **primers.** *Proceedings of the National Academy of Sciences of the United*  
768 *States of America.* 1989; 86:6196-200.
- 769 41. Kubi C, Van den Abbeele J, De Deken R, *et al.*: **The effect of starvation on**  
770 **the susceptibility of teneral and non-teneral tsetse flies to trypanosome**  
771 **infection.** *Medical and veterinary entomology.* 2006; 20(4):388-92.
- 772 42. Lah EFC, Ahamad M, Haron MS, *et al.*: **Establishment of a molecular tool for**  
773 **blood meal identification in Malaysia.** *Asian Pacific Journal of Tropical*  
774 *Biomedicine.* 2012; 2(3):223-27.
- 775 43. Langridge WP, Kernaghan RJ, Glover PE. **A review of recent knowledge of the**  
776 **ecology of the main vectors of trypanosomiasis.** *B World Health Organ.*  
777 1963; 28:671-701.
- 778 44. Le S, Josse J, Husson F. **FactoMineR: An R package for multivariate analysis.**  
779 *Journal of Statistical Software.* 2008; 25(1):1-18.
- 780 45. Leak SGA. **Tsetse biology and ecology. The role in the epidemiology and**  
781 **control of trypanosomiasis.** London: CABI Publishing, 1998.
- 782 46. Leigh JW, Bryant D. **POPART: full-feature software for haplotype network**  
783 **construction.** *Methods Ecol Evol.* 2015; 6(9):1110-16.
- 784 47. Librado P, Rozas J. **DnaSP v5: a software for comprehensive analysis of DNA**  
785 **polymorphism data.** *Bioinformatics.* 2009; 25(11):1451-2.
- 786 48. Lord JS, Lea RS, Allan FK, *et al.*: **Assessing the effect of insecticide-treated**  
787 **cattle on tsetse abundance and trypanosome transmission at the wildlife-**  
788 **livestock interface in Serengeti, Tanzania.** *Plos Neglect Trop D.* 2020;  
789 14(8):e0008288.
- 790 49. Lord JS, Torr SJ, Auty HK, *et al.*: **Geostatistical models using remotely-**  
791 **sensed data predict savanna tsetse decline across the interface between**  
792 **protected and unprotected areas in Serengeti, Tanzania.** *J Appl Ecol.*  
793 2018; 55(4):1997-2007.
- 794 50. Lyimo IN, Ferguson HM. **Ecological and evolutionary determinants of host**  
795 **species choice in mosquito vectors.** *Trends in Parasitology.* 2009;  
796 25(4):189-96.
- 797 51. Mbahin N, Affognon H, Andoke J, *et al.*: **Parasitological prevalence of bovine**  
798 **trypanosomiasis in Kubo Division of Kwale Country of Coastal: baseline**  
799 **survey** *American Journal of Animal and Veterinary Sciences.* 2013; 8(1):28-  
800 36.
- 801 52. McFadden D. **The measurement of urban travel demand.** *Journal of Public*  
802 *Economics.* 1974; 3(4):303-28.

- 803 53. Metsky HC, Siddle KJ, Gladden-Young A, *et al.*: **Capturing sequence diversity**  
804 **in metagenomes with comprehensive and scalable probe design.** *Nat*  
805 *Biotechnol.* 2019; 37(2):160-+.
- 806 54. Muturi CN, Ouma JO, Malele, II, *et al.*: **Tracking the feeding patterns of**  
807 **tsetse flies (*Glossina* genus) by analysis of bloodmeals using**  
808 **mitochondrial cytochromes genes.** *PLoS One.* 2011; 6(2):e17284.
- 809 55. Njenga SM, Mwandawiro CS, Muniu E, *et al.*: **Adult population as potential**  
810 **reservoir of NTD infections in rural villages of Kwale district, Coastal**  
811 **Kenya: implications for preventive chemotherapy interventions policy.**  
812 *Parasites & Vectors.* 2011; 4(1):1-6.
- 813 56. Njiru ZK, Constantine CC, Guya S, *et al.*: **The use of ITS1 rDNA PCR in**  
814 **detecting pathogenic African trypanosomes.** *Parasitology Research.* 2005;  
815 **95(3):186-92.**
- 816 57. OIE. Trypanosomosis (tsetse-transmitted). April 2013 ed, 2013.
- 817 58. Okoth SO, Kokwaro ED, Kirugu JM, *et al.*: ***Glossina pallidipes* and host**  
818 **interactions: implications of host preference on transmission Risk of**  
819 **Rhodesian Sleeping Sickness in Kenya.** *Trends in Applied Sciences*  
820 *Research.* 2007; 2(5):386-94.
- 821 59. Omondi D, Masiga DK, Ajamma YU, *et al.*: **Unraveling host-vector-arbovirus**  
822 **Interactions by two-gene high resolution melting mosquito bloodmeal**  
823 **analysis in a Kenyan wildlife-livestock Interface.** *PloS one.* 2015;  
824 **10(7):e0134375-e75.**
- 825 60. Pradhan V, Kamble Y, Ladniya V, *et al.*: **A overview of species identification**  
826 **by DNA barcoding.** *International Journal of Current Microbiology and*  
827 *Applied Sciences* 2015; 4(4):127-40.
- 828 61. **Se-Al: Sequence Alignment Editor [program].** Oxford, UK: Department of  
829 Zoology, University of Oxford. 1996.
- 830 62. Reeves L, Gillett-Kaufman J, Kawahara A, *et al.*: **Barcoding blood meals: New**  
831 **vertebrate-specific primer sets for assigning taxonomic identities to host**  
832 **DNA from mosquito blood meals.** *PLoS Neglected Tropical Disease.* 2018;  
833 **12(8):e0006767.**
- 834 63. Schofield S, Torr SJ. **A comparison of the feeding behaviour of tsetse and**  
835 **stable flies.** *Medical and veterinary entomology.* 2002; 16(2):177-85.
- 836 64. Schratz P. R package 'oddsratio': Odds ratio calculation for GAM(M)s &  
837 **GLM(M)s, version: 1.0.2.** 2017;
- 838 65. Snow WF, Tarimo SA, Staak C, *et al.*: **The feeding-habits of the Tsetse,**  
839 ***Glossina pallidipes* Austen on the South Kenya Coast, in the context of**  
840 **its host range and trypanosome infection-rates in other parts of East-**  
841 **Africa.** *Acta Tropica.* 1988; 45(4):339-49.
- 842 66. Spath J. **Feeding patterns of three sympatric tsetse species (*Glossina* spp.)**  
843 **(Diptera : Glossinidae) in the preforest zone of Cote d'Ivoire.** *Acta*  
844 *Tropica.* 2000; 75(1):109-18.
- 845 67. Team RC. **R: A Language and Environment for Statistical Computing.** R  
846 **Foundation for Statistical Computing.** Vienna2016.
- 847 68. Torr SJ, Wilson PJ, Schofield S, *et al.*: **Application of DNA markers to identify**  
848 **the individual-specific hosts of tsetse feeding on cattle.** *Medical Vet*  
849 *Entomology.* 2001; 15(1):78 - 86.
- 850 69. Turner DA. **The population ecology of *Glossina pallidipes* Austen (Diptera:**  
851 ***Glossinidae*) in the Lambwe Valley, Kenya. I. Feeding behaviour and**  
852 **activity patterns.** *Bulletin of Entomological Research.* 1987; 77(02):317-33.
- 853 70. Vale GA. **Feeding responses of tsetse flies (Diptera-Glossinidae) to stationary**  
854 **hosts.** *Bulletin of Entomological Research.* 1977; 67(4):635-49.

- 855 71. Viana M, Mancy R, Biek R, *et al.*: **Assembling evidence for identifying**  
856 **reservoirs of infection.** *Trends in Ecology & Evolution.* 2014; **29**(5):270-79.  
857 72. Weitz B. **The feeding habits of *Glossina*.** *Bulletin of World Health*  
858 *Organization.* 1963; **28**:711-29.  
859 73. Welburn SC, Picozzi K, Fevre EM, *et al.*: **Identification of human-infective**  
860 **trypanosomes in animal reservoir of sleeping sickness in Uganda by**  
861 **means of serum-resistance-associated (SRA) gene.** *Lancet.* 2001;  
862 **358**(9298):2017-19.  
863 74. Welburn SC, Picozzi K, Kaare M, *et al.*: **Control options for human sleeping**  
864 **sickness in relation to the animal reservoir of disease.** *Conservation and*  
865 *Development Interventions at the Wildlife/Livestock Interface.* 2005:55-61.  
866 75. Wongserepipatana M. **Prevalence and associations of *Trypanosoma* spp. and**  
867 ***Sodalis glossinidius* with intrinsic factors of tsetse flies.** University of  
868 Glasgow. 2016.  
869  
870
